# Supplementary material
Source: Atypon-hosted journal article supplement (https://sp.blackgold.org/Record/422092/DownloadSupplementalFile?fileId=272)
Supplement: DownloadSupplementalFile [file DownloadSupplementalFile]

## Underground Railroad (Whitehead)

[Summary](#) | [Author Bio](#) | [Book Reviews](#) | [Discussion Questions](#) | [Full Version](#) | [Print](#)

### *The Underground Railroad*

Colson Whitehead, 2016

Knopf Doubleday

320 pp.

ISBN-13: 9780385542364

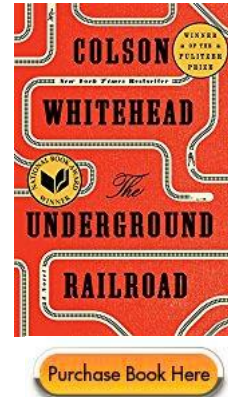

### Summary

Winner, 2017 Pulitzer Prize-Fiction

Nominated, 2016 National Book Awards

*A magnificent tour de force chronicling a young slave's adventures as she makes a desperate bid for freedom in the antebellum South.*

Cora is a slave on a cotton plantation in Georgia. Life is hell for all the slaves, but especially bad for Cora; an outcast even among her fellow Africans, she is coming into womanhood—where even greater pain awaits.

When Caesar, a recent arrival from Virginia, tells her about the Underground Railroad, they decide to take a terrifying risk and escape.

Matters do not go as planned—Cora kills a young white boy who tries to capture her. Though they manage to find a station and head north, they are being hunted.

In Whitehead's ingenious conception, the Underground Railroad is no mere metaphor—engineers and conductors operate a secret network of tracks and tunnels beneath the Southern soil. Cora and Caesar's first stop is South Carolina, in a city that initially seems like a haven.

But the city's placid surface masks an insidious scheme designed for its black denizens. And even worse: Ridgeway, the relentless slave catcher, is close on their heels. Forced to flee again, Cora embarks on a harrowing flight, state by state, seeking true freedom.

Like the protagonist of *Gulliver's Travels*, Cora encounters different worlds at each stage of her journey—hers is an odyssey through time as well as space. As Whitehead brilliantly re-creates the unique terrors for black people in the pre-Civil War era, his narrative seamlessly weaves the saga of America from the brutal importation of Africans to the unfulfilled promises of the present day.

*The Underground Railroad* is at once a kinetic adventure tale of one woman's ferocious will to escape the horrors of bondage and a shattering, powerful meditation on the history we all share. *(From the publisher.)*

---

Prev **Next >>**

Site by **BOOM** (<http://www.boomsuper.com>)  (<http://www.boomsuper.com>)
